# Supplementary material for: Flavonoid Fraction of Orange and Bergamot Juices Protect Human Lung Epithelial Cells from Hydrogen Peroxide-Induced Oxidative Stress
Source: Hindawi journal article supplement (doi:10.1155/2015/957031), 2015-01-01

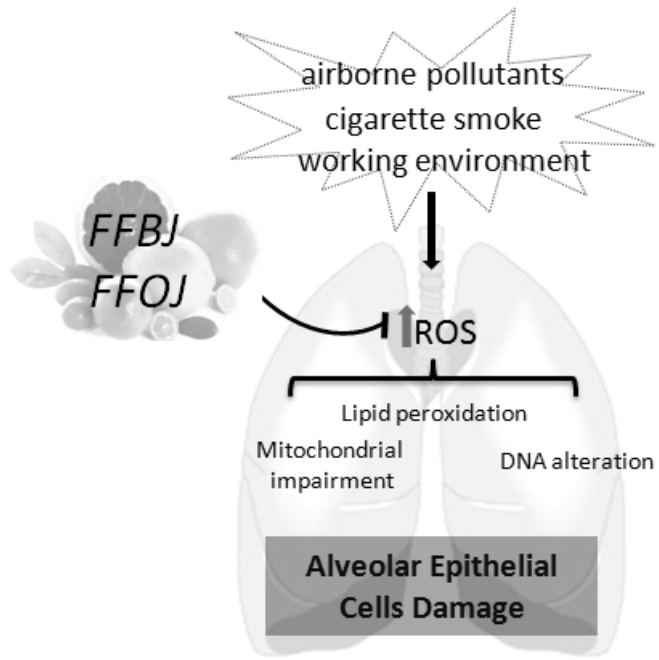

Supplement: f1 [file 957031.f1.pdf]
